# Supplementary material for: A paxillin tyrosine phosphorylation switch regulates the assembly and form of cell-matrix adhesions
Source: Oxford University Press journal article supplement (doi:10.1242/jcs.03314), 2006-12-13
Supplement: jcs03314tables1.pdf [file jcs03314tables1.pdf]

**Table S1. Construction of paxillin phosphorylation mutants**

|                              |                                                  |                |
|------------------------------|--------------------------------------------------|----------------|
| Primer 1                     | GA <u>AGA TCT</u> ATG GAC GAC CTC GAC GCC C      | <i>Bgl</i> III |
| Primer 2<br>(glutamic acid)  | GTT TCC AGT TGG GTA TGA <u>CTC</u> GGG GGT CTC C | E              |
| Primer 2'<br>(phenylalanine) | GTT TCC AGT TGG GTA TGA <u>GAA</u> GGG GGT CTC C | F              |
| Primer 3                     | TCA TAC CCA ACT GGA AAC                          |                |
| Primer 4                     | C <u>GAA TTC</u> CTA GCA GAA GAG CTT GAG GAA G   | <i>Eco</i> RI  |
| Primer 5<br>(glutamic acid)  | G CTT GTT GGG GAA GCT <u>CTC</u> GAC GTG CTC CTC | E              |
| Primer 5'<br>(phenylalanine) | G CTT GTT GGG GAA GCT <u>GAA</u> GAC GTG CTC CTC | F              |
| Primer 6                     | AGC TTC CCC AAC AAG C                            |                |

Both mutants of paxillin were constructed by PCR, using an identical procedure, and then cloned into YFP-C1 vector (Clontech) using *Bgl*III and *Eco*RI restriction sites. The difference between the two mutants was in primers 2 and 5, in which tyrosine residues 31 and 118 were replaced with glutamic acid for the phosphomimetic mutant (2,5) or with phenylalanine for the non-phosphorylatable mutant (2',5')
