# Supplementary material for: A paxillin tyrosine phosphorylation switch regulates the assembly and form of cell-matrix adhesions
Source: Oxford University Press journal article supplement (doi:10.1242/jcs.03314), 2006-12-13
Supplement: jcs03314tables2.pdf [file jcs03314tables2.pdf]

**Table S2. PCR procedure**

| Reaction        | Primers        | Template     | T <sub>m</sub> | Product            | Length |
|-----------------|----------------|--------------|----------------|--------------------|--------|
| 1A*             | 1+2            | YFP-paxillin | 52             | ATG→111 inc Y31E   | 119    |
| 1B*             | 3+5            | YFP-paxillin | 50             | 94→370 inc Y118E   | 276    |
| 1C <sup>†</sup> | 6+4            | YFP-paxillin | 50             | 354→stop           | 1348   |
| 2 <sup>†</sup>  | Template → 1+5 | 1A + 1B      | 50→ 64         | ATG→370 w both mut | 378    |
| 3 <sup>‡</sup>  | Template → 1+4 | 1C + 2       | 50→ 64         | ATG→stop both mut  | 1710   |

\*Products from reactions 1A and 1B were purified from gel for reaction 2. <sup>†</sup>Products from reaction 1C and 2 were purified from gel for reaction 3. <sup>‡</sup>Product of reaction 3 was gel purified, then digested with *Bgl*II and *Eco*RI, cleaned on a colon and then ligated with YFP-C1, which was previously digested with same enzymes and gel purified.
